# Supplementary material for: Quantitative Real-Time PCR Based on SYBR Green Technology for the Identification of Philaenus italosignus Drosopoulos & Remane (Hemiptera Aphrophoridae)
Source: MDPI journal article supplement (doi:10.3390/plants11233314), 2022-11-30
Supplement: s1 [file s1]

**Figure S1.** Complete alignment of Spit-Uni1/2 products: nine EF1- $\alpha$  alleles cloned from two *Philaenus italosignus* (Pi1 and Pi2) and two *P. spumarius* (Ps3 and Ps4) specimens collected during this study in Tuscany (Italy). The homologous sequences of the two alleles of *P. spumarius* PSPU\_08 (GCA\_018207615.1) and of the only allele of *P. italosignus* (JF309079) currently available in the Genbank database, were included for comparative purposes as PsRef1, PsRef2 and PiRef1, respectively. The exon region of the EF1- $\alpha$  alleles is underlined meanwhile, within the intron region, the positions of the *P. italosignus* specific qPCR assay primers, Pital\_348F and Pital\_465R, are highlighted in black and gray, respectively. The "\*" character indicates positions that are fully conserved.

|         |                                                                       |     |
|---------|-----------------------------------------------------------------------|-----|
| PiRef-1 | <u>AAACGTACCATTGAGAAGTTCGAGAAGGAAGCCCCAAGAAGTAAGTTGACTA</u> -----TACT | 55  |
| Pi1-1   | <u>AAACGTACCATTGAGAAGTTCGAGAAGGAAGCCCCAAGAAGTAAGTTGACTA</u> -----AACT | 55  |
| Pi1-2   | <u>AAACGTACCATTGAGAAGTTCGAGAAGGAAGCCCCAAGAAGTAAGTTGACTA</u> -----AACT | 55  |
| Pi2-1   | <u>AAACGTACCATTGAGAAGTTCGAGAAGGAAGCCCCAAGAAGTAAGTTGACTA</u> -----TACT | 55  |
| Pi2-2   | <u>AAACGTACCATTGAGAAGTTCGAGAAGGAAGCCCCAAGAAGTAAGTTGACTA</u> -----AACT | 55  |
| PsRef-1 | <u>AAACGTACCATTGAGAAGTTCGAGAAGGAAGCCCCAAGAAGTAAGTTGACTA</u> -----TACT | 55  |
| PsRef-2 | <u>AAACGTACCATTGAGAAGTTCGAGAAGGAAGCCCCAAGAAGTAAGTTGACTA</u> -----TACT | 55  |
| Ps3-1   | <u>AAACGTACCATTGAGAAGTTCGAGAAGGAAGCCCCGAGAAGTAAGTTGACTATAGCCTACT</u>  | 60  |
| Ps3-2   | <u>AAACGTACCATTGAGAAGTTCGAGAAGGAAGCCCCAAGAAGTAAGTTGACTATAGCCTACT</u>  | 60  |
| Ps4-1   | <u>AAACGTACCATTGAGAAGTTCGAGAAGGAAGCCCCAAGAAGTAAGTTGACTA</u> -----TACT | 55  |
| Ps4-2   | <u>AAACGTACCATTGAGAAGTTCGAGAAGGAAGCCCCAAGAAGTAAGTTGACTA</u> -----TACT | 55  |
| Ps4-3   | <u>AAACGTACCATTGAGAAGTTCGAGAAGGAAGCCCCAAGAAGTAAGTTGACTA</u> -----TACT | 55  |
|         | *****                                                                 | *** |
| PiRef-1 | AGCAGAATAAAATTTGAATCAACTCCTATAAAAGCGAGTAACATATAGG---CGTAATAT          | 112 |
| Pi1-1   | AGCGGAATAAAATTTGAATCAACTCCTATAAAAGCGAGTAACATATATAGG-CCTAATAT          | 114 |
| Pi1-2   | AGCGGAATAAAATTTGAATCAACTCCTATAAAAGCGAGTAACATATATAGG-CCTAATAT          | 114 |
| Pi2-1   | AGCGGAATAAAATTTGAATCAACTCCTATAAAAGCGAGTAACATATAGG---CGTAATAT          | 112 |
| Pi2-2   | AGCGGAATAAAATTTGAATCAACTCCTATAAAAGCGAGTAACATATATAGG-CCTAATAT          | 114 |
| PsRef-1 | AGCGGAATAAAATTTAAATGAACTCCTATAAAAGCGAGTAACATA-----TATAATAT            | 108 |
| PsRef-2 | AGCGGAATAAAATTTAAATGAACTCCTATAAAAGCGAGTAACATA-----TATAATAT            | 108 |
| Ps3-1   | AGCGGAATAAAATTTAAATCAACTCCTATAAAAGCGAGTAACATA-----TAT                 | 108 |
| Ps3-2   | AGCGGAATAAAATTTAAATCAACTCCTATAAAAGCGAGTAACATA-----TAT                 | 108 |
| Ps4-1   | AGCGGAATAAAATTTAAATCAACTCCTATAAAAGCGAGTAACATA-----TATTATAT            | 108 |
| Ps4-2   | AGCGGAATAAAATTTAAATGAACTCCTATAAAAGCGAGTAACATATATAGCCTATAATAT          | 115 |
| Ps4-3   | AGCGGAATAAAATTTAAATGAACTCCTATAAAAGCGAGTAACATATATAGCCTATAATAT          | 115 |
|         | *** *****                                                             | *** |
| PiRef-1 | AATAGCTGATTTACCCATCATCTGTAATACATAAAACATAGCCTAACTCGTGTAGGTTGT          | 172 |
| Pi1-1   | AACAGCTGATTTACCCATCATCTGTAATACATAAAACATAGCCTAACCCGTGTAGGTTGT          | 174 |
| Pi1-2   | AACAGCTGATTTACCCATCATCTGTAATACATAAAACATAGCCTAACCCGTGTAGGTTGT          | 174 |
| Pi2-1   | AATAGCTGATTTACCCATCATCTGTAATACATAAAACATAGCCTAACTCGTGTAGGTTGT          | 172 |
| Pi2-2   | AACAGCTGATTTACCCATCATCTGTAATACATAAAACATAGCCTAACCCGTGTAGGTTGT          | 174 |
| PsRef-1 | AATAGCTGATTTACCAATCATCTGTAATACATAAAACATAGCCTAACCCGTGTAGGTTGT          | 168 |
| PsRef-2 | AATAGCTGATTTACCAATCATCTGTAATACATAAAACATAGCCTAACCCGTGTAGGTTGT          | 168 |
| Ps3-1   | ATTAGCTGATTTACCAATCATCTGTAATACATAAAACATAGCCTAACCCGTGTAGGTTGG          | 168 |
| Ps3-2   | AATAGCTGATTTACCAATCATCTGTAATACATAAAACATAGCCTAACCCGTGTAGGTTGG          | 168 |
| Ps4-1   | AATAGCTGATTTACCAATCATCTGTAATACATAAAACATAGCCTAACCCGTGTAGGTTGT          | 168 |
| Ps4-2   | AATAGCTGATTTACCAATCATCTGTAATACATAAAACATAGCCTAACCCGTGTAGGTTGT          | 175 |
| Ps4-3   | AATAGCTGATTTACCAATCATCTGTAATACATAAAACATAGCCTAACCCGTGTAGGTTGT          | 175 |
|         | * *****                                                               |     |
| PiRef-1 | AGTTCGGGGTTATGTTTACAACCTCAATCGTTATAATTTCTTGTGAAGTAGATTTTTTTA          | 232 |
| Pi1-1   | AGTTCGGGGTTATGTTTACAACCTCAATCGTTATAATTTCTTGTGAAGTAGA-TTTTTTTA         | 233 |
| Pi1-2   | AGTTCGGGGTTATGTTTACAACCTCAATCGTTATAATTTCTTGTGAAGTAGA-TTTTTTTA         | 233 |
| Pi2-1   | AGTTCGGGGTTATGTTTACAACCTCAATCGTTATAATTTCTTGTGAAGTAGATTTTTTTA          | 232 |
| Pi2-2   | AGTTCGGGGTTATGTTTACAACCTCAATCGTTATAATTTCTTGTGAAGTAGA-TTTTTTTA         | 233 |
| PsRef-1 | AGTTTGGGGTTATGTTTACAACCTCA-----TTTT                                   | 198 |
| PsRef-2 | AGTTTGGGGTTATGTTTACAACCTCA-----TTTT                                   | 198 |
| Ps3-1   | AGTTAGGGGTTATGTTTACAACCTCAATCGTTATAAATTCTTGTAAAGTTGA--TTTTTT          | 226 |
| Ps3-2   | AGTTAGGGGTTATGTTTACAACCTCAATCGTTATAAATTCTTGTAAAGTTGA--TTTTTT          | 226 |
| Ps4-1   | AGTTTGGGGTTATGTTTACAACCTCAATCGTTATAAATTCTTGTGAAGTTGA--TTTTTT          | 226 |

|         |                                                                       |     |
|---------|-----------------------------------------------------------------------|-----|
| Ps4-2   | AGTTTGGGGTTATGTTTACAACCTCAATCGTTATAATTTCTTGTGAAGTTGA-TTTTTTT          | 234 |
| Ps4-3   | AGTTTGGGGTTATGTTTACAACCTCAATCGTTATAATTTCTTGTGAAGTTGA-TTTTTTT<br>***** | 234 |
| PiRef-1 | AAATTTGAGTTACAGAACTAATGTATGCTATAATATGACGTTATATTTGC-TTTGAGGTT          | 291 |
| Pi1-1   | AAATTTGAGTTACAGAACTAATGTATGCTATAATATGACGTTATATTTGC-TTTGAGGTT          | 292 |
| Pi1-2   | AAATTTGAGTTACAGAACTAATGTATGCTATAATATGACGTTATATTTGC-TTTGAGGTT          | 292 |
| Pi2-1   | AAATTTGAGTTACAGAACTAATGTATGCTATAATATGACGTTATATTTGC-TTTGAGGTT          | 291 |
| Pi2-2   | AAATTTGAGTTACAGAACTAATGTATGCTATAATATGACGTTATATTTGC-TTTGAGGTT          | 292 |
| PsRef-1 | TAATTTGAGTTAAAGAACTAATATATGCTATAATATGACGTTATATTTGCTTTTGAGGTT          | 258 |
| PsRef-2 | TAATTTGGGTTAAAGAACTAATATATGCTATAATATGACGTTATATTTGCTTTTGAGGTT          | 258 |
| Ps3-1   | TAATTTGAGTTACAGAACTAATATATGCTATAATATGACGTTATATTTGC-TTTAAGGTT          | 285 |
| Ps3-2   | TAATTTGAGTTACAGAACTAATATATGCTATAATATGACGTTATATTTGC-TTTAAGGTT          | 285 |
| Ps4-1   | TAATTTGAGTTAAAGAACTAATATATGCTATAATATGACGTTATATTTGCTTTTGAGGTT          | 286 |
| Ps4-2   | TAATTTGAGTTACAGAACTAATATATGCTATAATATGATGTTATATTTGC-TTTGAGGTT          | 293 |
| Ps4-3   | TAATTTGAGTTACAGAACTAATATATGCTATAATATGATGTTATATTTGC-TTTGAGGTT<br>***** | 293 |
| PiRef-1 | ATAAACTGTAGGCCCTATGTAA-----TCA-TATATTTATTCAAATTTA                     | 334 |
| Pi1-1   | ATAAACTGTAGGCCCTATGTAA-----TCAATATATTTATTCAAATTTA                     | 336 |
| Pi1-2   | ATAAACTGTAGGCCCTATGTAA-----TCAATATATTTATTCAAATTTA                     | 336 |
| Pi2-1   | ATAAACTGTAGGCCCTATGTAA-----TCAATATATTTATTCAAATTTA                     | 335 |
| Pi2-2   | ATAAACTGTAGGCCCTATGTAA-----TCAATATATTTATTCAAATTTA                     | 336 |
| PsRef-1 | ATAAACTGTAGGCCCTATGTAAATACAACCTTTTATCATCAATATATTTATTTAAATTTA          | 318 |
| PsRef-2 | ATAAACTGTAGGCCCTATGTAAATACAACCTTTTATCATCAATATATTTATTTAAATTTA          | 318 |
| Ps3-1   | ATAAACTGTAGGCCCTATGTAAATACAACCTTTTATCATGAATATATTTATTTAAATTTA          | 345 |
| Ps3-2   | ATAAACTGTAGGCCCTATGTAAATACAACCTTTTATCATGAATATATTTATTTAAATTTA          | 345 |
| Ps4-1   | ATAAACTGTAGGCCCTATGTAAATACAACCTTTTATCGTCAATATATTTATTTAAATTTA          | 346 |
| Ps4-2   | ATAAACTGTAGGCCCTATGTAAATACAATCTTTTATCATCAATATATTTATTTAAATTTA          | 353 |
| Ps4-3   | ATAAACTGTAGGCCCTATGTAAATACAATCTTTTATCATCAATATATTTATTTAAATTTA<br>***** | 353 |
| PiRef-1 | AAGA-GATCTATTCGTTTAACTTCGGAATTATTCATAGCCCTATATATTCGTAAAATAAT          | 393 |
| Pi1-1   | AAGA-GATCTATTCGTTTAACTTCGGAATTATTCGATAGCCCTATATCTTCGTAAAATAAT         | 395 |
| Pi1-2   | AAGA-GATCTATTCGTTTAACTTCGGAATTATTCGATAGCCCTATATCTTCGTAAAATAAT         | 395 |
| Pi2-1   | AAGA-GATCTATTCGTTTAACTTCGGAATTATTCATAGCCCTATATATTCGTAAAATAAT          | 394 |
| Pi2-2   | AAGA-GATCTATTCGTTTAACTTCGGAATTATTCGATAGCCCTATATCTTCGTAAAATAAT         | 395 |
| PsRef-1 | AAGCTGATCTATTCGTTTAACTTCGGAACATTTCGATAGCCCTATATCTTCGTAAAATAAT         | 378 |
| PsRef-2 | AAGCTGATCTATTCGTTTAACTTCGGAACATTTCGATAGCCCTATATCTTCGTAAAATAAT         | 378 |
| Ps3-1   | AAGCTAATCTATTCGTTTAACTTCGGAACATTTCGATAGCCCTATATCTTCGTAAAATAAT         | 404 |
| Ps3-2   | AAGCTAATCTATTCGTTTAACTTCGGAACATTTCGATAGCCCTATATCTTCGTAAAATAAT         | 404 |
| Ps4-1   | AAGCTGATCTATTCGTTTAACTTCGGAACATTTCGATAGCCCTATATCTTCGTAAAATAAT         | 406 |
| Ps4-2   | AAGCTGATCTATTCGTTTAACTTCGGAACATTTCGATAGCCCTATATCTTCGTAAAATAAT         | 413 |
| Ps4-3   | AAGCTGATCTATTCGTTTAACTTCGGAACATTTCGATAGCCCTATATCTTCGTAAAATAAT<br>***  | 413 |
| PiRef-1 | TACTATTTCAATTATTAATTTCTCCATTATAGCCTAATATTAATAACTTCCAAATCATTTG         | 453 |
| Pi1-1   | TAATATTTCAATTATTAATTTCTCCATTATAGAATA--ATTAATAACTTCCAAATTATTTG         | 453 |
| Pi1-2   | TAATATTTCAATTATTAATTTCTCCATTATAGAATA--ATTAATAACTTCCAAATTATTTG         | 453 |
| Pi2-1   | TACTATTTCAATTATTAATTTCTCCATTATAGCCTAATATTAATAACTTCCAAATCATTTG         | 454 |
| Pi2-2   | TAATATTTCAATTATTAATTTCTCCATTATAGAATA--ATTAATAACTTCCAAATTATTTG         | 453 |
| PsRef-1 | TAATATTTCAATTAGTCATTTCTCCATTATAGCCTAATATTAATAACTTCCAAATCATTTG         | 438 |
| PsRef-2 | TAATATTTCAATTAGTCATTTCTCCATTATAGCCTAATATTAATAACTTCCAAATCATTTG         | 438 |
| Ps3-1   | TAATATTTCAATTAGTCATTTCTCCATTATAGCCTAATATTAATAACTTCCAAATCATTTG         | 464 |
| Ps3-2   | TAATATTTCAATTAGTCATTTCTCCATTATAGCCTAATATTAATAACTTCCAAATCATTCG         | 464 |
| Ps4-1   | TAATATTTCAATTAGTCATTTCTCCATTATAGCCTAATATTAATAACTTCCAAATCATTTG         | 466 |
| Ps4-2   | TAATATTTCTTTAGTCATTTCTCCATTATAGCCTAATATTAATAACTTCCAAATCATTTG          | 473 |
| Ps4-3   | TAATATTTCTTTAGTCATTTCTCCATTATAGCCTAATATTAATAACTTCCAAATCATTTG<br>**    | 473 |
| PiRef-1 | ATCTATCAAATATGAAAT-AAAAGCAATTAAAGATAGTATTTTTATCACATAATAACC            | 512 |
| Pi1-1   | ATCTATCAAATATGAAAT-AAAAGCAATTAAAGATAGTATTTTTATCACGTAATAACC            | 512 |
| Pi1-2   | ATCTATCAAATATGAAAT-AAAAGCAATTAAAGATAGTATTTTTATCACGTAATAACC            | 512 |

|         |                                                                    |     |
|---------|--------------------------------------------------------------------|-----|
| Pi2-1   | ATCTATCAAAATATGAAAT-AAAAGCAATTAAAAGATAGTATTTTTATCACATAATAACC       | 513 |
| Pi2-2   | ATCTATCAAAATATGAAAT-AAAAGCAATTAAAAGATAGTATTTTTATCACGTAATAACC       | 512 |
| PsRef-1 | ATCTATC--AATATGAAAT-AAAAGCAATTAAAAGGTAGTATTTTTATCGCATAATAACC       | 495 |
| PsRef-2 | ATCTATC--AATATGAAAT-AAAAGCAATTAAAAGGTAGTATTTTTATCGCATAATAACC       | 495 |
| Ps3-1   | ATCTATC--AATATGAAATAAAAAACAATTAAAAGATAGTATTTTTATCGCACAATAACC       | 522 |
| Ps3-2   | ATCTATC--AATATGAAATAAAAAACAATTAAAAGATAGTATTTTTATCGCACAATAACC       | 522 |
| Ps4-1   | ATCTATC--AATATGAAAT-AAAAGCAATTAAAAGATAGTATTTTTATCGCATAATAACC       | 523 |
| Ps4-2   | ATCTATC--AATATGAAAT-AAAAGCAATTAAAAGATAGTATTTTTATCGCATAATAACC       | 530 |
| Ps4-3   | ATCTATC--AATATGAAAT-AAAAGCAATTAAAAGGTAGTATTTTTATTGCGTAATAACC       | 530 |
|         | *****      *****      ****      *****      *****      *      ***** |     |
|         |                                                                    |     |
| PiRef-1 | TATGTAAATATAAAAAGTTCAGCAAATAGGCCTACAGTTTTATAATCGTTATTACTGTACA      | 572 |
| Pi1-1   | TATGTAAATATAAAAAGTTCAGCAAATAGGCCTACAGTTTTATAATCGTTATTACTGTACA      | 572 |
| Pi1-2   | TATGTAAATATAAAAAGTTCAGCAAATAGGCCTACAGTTTTATAATCGTTATTACTGTACA      | 572 |
| Pi2-1   | TATGTAAATATAAAAAGTTCAGCAAATAGGCCTACAGTTTTATAATCGTTATTACTGTACA      | 573 |
| Pi2-2   | TATGTAAATATAAAAAGTTCAGCAAATAGGCCTACAGTTTTATAATCGTTATTACTGTACA      | 572 |
| PsRef-1 | TATGTAAATATAAATGTTTCAGCAAATAGGCCTACAGTTTTATAATCGTTAT-----          | 546 |
| PsRef-2 | TATGTAAATATAAATGTTTCAGCAAATAGGCCTACAGTTTTATAATCGTTAT-----          | 546 |
| Ps3-1   | TATGTAAATATAAATGTTTCAGCAAATAGGCCTACAGTTTTATAATCGTTAT-----          | 573 |
| Ps3-2   | TATGTAAATATAAATGTTTCAGCAAATAGGCCTACAGTTTTATAATCGTTAT-----          | 573 |
| Ps4-1   | TATGTAAATATAAATGTTTCAGCAAATAGGCCTACAGTTTTATAATCGTTAT-----          | 574 |
| Ps4-2   | TATGTAAATATAAATGTTTCAGCAAATAGGCCTACAGTTTTATAATCGTTAT-----          | 581 |
| Ps4-3   | TATGTAAATATAAATGTTTCAGCAAATAGGCCTACAGTTTTATAATCGTTAT-----          | 581 |
|         | *****      *****      *****      *****      *****      *****       |     |
|         |                                                                    |     |
| PiRef-1 | CATTTATAGAGTTAAAAATCCCCGTCAGCATAGTTAGGTAGGAATAGATAAAATATTCCTT      | 632 |
| Pi1-1   | CATTTATAGAGTTAAAAATCCCCGTCAGCATAGTTAGGTAGGAATAGATAAAATATTCCTT      | 632 |
| Pi1-2   | CATTTATAGAGTTAAAAATCCCCGTCAGCATAGTTAGGTAGGAATAGATAAAATATTCCTT      | 632 |
| Pi2-1   | CATTTATAGAGTTAAAAATCCCCGTCAGCATAGTTAGGTAGGAATAGATAAAATATTCCTT      | 633 |
| Pi2-2   | CATTTATAGAGTTAAAAATCCCCGTCAGCATAGTTAGGTAGGAATAGATAAAATATTCCTT      | 632 |
| PsRef-1 | -----TAGAGTTAAAAATCCCTGTCGGCGTAGTTAGGTAGGCCTAGATAAAATATTCCTT       | 600 |
| PsRef-2 | -----TAGAGTTAAAAATCCCTGTCGGCGTAGTTAGGTAGGCCTAGATAAAATATTCCTT       | 600 |
| Ps3-1   | -----TAGAGTTAAAAATCCCTGTCGGCATACTTAGGTAGGCCTAGATAAAATATTCCTT       | 627 |
| Ps3-2   | -----TAGAGTTAAAAATCCCTGTCGTCATACTTAGGTAGGCCTAGATAAAATATTCCTT       | 627 |
| Ps4-1   | -----TAGAGTTAAAAATCCCTGTCGGCA-----TAGATAAAATATTCCTT                | 614 |
| Ps4-2   | -----TAGAGTTAAAAATCCCTGTCGGCA-----TAGATAAAATATTCCTT                | 614 |
| Ps4-3   | -----TAGAGTTAAAAATCCCTGTCGGCGTAGTTAGGTAGGCCTAGATAAAATATTCCTT       | 614 |
|         | *****      ***      **      *****                                  |     |
|         |                                                                    |     |
| PiRef-1 | TAAGTTGTTTTTAAATTGTTTGTTTTTAAATGATGTATTTCTGATTTGTATCTAATTAA        | 692 |
| Pi1-1   | TAAGTTGTTTTTAAATTGTTTGTTTTTAAATGATGTATTTCTGATTTGTATCTAATTAA        | 692 |
| Pi1-2   | TAAGTTGTTTTTAAATTGTTTGTTTTTAAATGATGTATTTCTGATTTGTATCTAATTAA        | 692 |
| Pi2-1   | TAAGTTGTTTTTAAATTGTTTGTTTTTAAATGATGTATTTCTGATTTGTATCTAATTAA        | 693 |
| Pi2-2   | TAAGTTGTTTTTAAATTGTTTGTTTTTAAATGATGTATTTCTGATTTGTATCTAATTAA        | 692 |
| PsRef-1 | TAAGTTGTTTTTAAATAGTTTGTTTTTAAATGATGTATTTCTGATTTGTATCAAATTAA        | 660 |
| PsRef-2 | TAAGTTGTTTTTAAATAGTTTGTTTTTAAATGATGTATTTCTGATTTGTATCAAATTAA        | 660 |
| Ps3-1   | TAAGTTGTTTTTAAATAGTTTGTTTTTAAATGATGTATTTCTAATTTGTATCTAATTAA        | 687 |
| Ps3-2   | TAAGTTGTTTTTAAATAGTTTGTTTTTAAATGATGTATTTCTGATTTGTATCTAATTAA        | 687 |
| Ps4-1   | TAAGTTGTTTTTAAATAGTTTGTTTTTAAATGATGTATTTCTGATTTGTATCTAATTAA        | 674 |
| Ps4-2   | TAAGTTGTTTTTAAATAGTTTGTTTTTAAATGATGTATTTCTGATTTGTATCTAATTAA        | 681 |
| Ps4-3   | TAAGTTGTTTTTAAATAGTTTGTTTTTAAATGATGTATTTCTGATTTGTATCTAATTAA        | 695 |
|         | *****      *****      *****      *****                             |     |
|         |                                                                    |     |
| PiRef-1 | TCAGC                                                              | 697 |
| Pi1-1   | TCAGC                                                              | 697 |
| Pi1-2   | TCAGC                                                              | 697 |
| Pi2-1   | TCAGC                                                              | 698 |
| Pi2-2   | TCAGC                                                              | 697 |
| PsRef-1 | TCAGC                                                              | 665 |
| PsRef-2 | TCAGC                                                              | 665 |
| Ps3-1   | TCAGC                                                              | 692 |
| Ps3-2   | TCAGC                                                              | 692 |
| Ps4-1   | TCAGC                                                              | 679 |

|       |       |     |
|-------|-------|-----|
| Ps4-2 | TCAGC | 686 |
| Ps4-3 | TCAGC | 700 |
|       | ***** |     |
